# Supplementary material
Source: HighWire-hosted journal article supplement (http://molpharm.aspetjournals.org/highwire/filestream/77155/field_highwire_adjunct_files/2/Supplemental_Table_3.pdf)
Supplement: Supplemental_Table_3.pdf [file Supplemental_Table_3.pdf]

# Direct Transcriptional Regulation of Human Hepatic Cytochrome P450 3A4 (CYP3A4) by Peroxisome Proliferator-Activated Receptor Alpha (PPAR $\alpha$ )

Maria Thomas, Oliver Burk, Britta Klumpp, Benjamin A. Kandel, Georg Damm, Thomas S. Weiss, Kathrin Klein,  
Matthias Schwab, Ulrich M. Zanger  
Molecular Pharmacology

**Supplemental Table 3: Gene expression analysis (fold changes) by qRT-PCR**

| GENE    | RNAI/1 | RNAI/2 | RNAI/3 | RNAI | StDev | WY14,643/1 | WY14,643/2 | WY14,643/3 | WY14,643 | StDev | POPC1 | POPC2 | POPC3 | POPC | StDev |
|---------|--------|--------|--------|------|-------|------------|------------|------------|----------|-------|-------|-------|-------|------|-------|
| ABCB1   | 1.15   | 1.02   | 0.86   | 1.01 | 0.12  | 1.16       | 1.27       | 0.19       | 0.87     | 0.49  | 1.11  | 0.67  | 1.21  | 1.00 | 0.24  |
| ABCC2   | 0.96   | 0.85   | 1.13   | 0.98 | 0.12  | 1.13       | 1.24       | 1.18       | 1.18     | 0.04  | 0.96  | 0.67  | 1.25  | 0.96 | 0.24  |
| ABCG2   | 1.23   | 1.28   | 1.13   | 1.21 | 0.06  | 1.20       | 0.78       | 1.02       | 1.00     | 0.17  | 1.09  | 1.12  | 0.86  | 1.02 | 0.12  |
| ACOX1   | 0.79   | 0.57   | 0.63   | 0.66 | 0.09  | 1.45       | 2.67       | 1.84       | 1.99     | 0.51  | 1.48  | 1.51  | 1.68  | 1.56 | 0.09  |
| ADH1A   | 1.00   | 0.86   | 1.03   | 0.96 | 0.07  | 1.12       | 1.06       | 1.17       | 1.12     | 0.05  | 0.92  | 1.12  | 1.08  | 1.04 | 0.09  |
| AHR     | 1.09   | 1.23   | 0.86   | 1.06 | 0.15  | 0.90       | 1.24       | 1.31       | 1.15     | 0.18  | 0.86  | 0.97  | 1.02  | 0.95 | 0.07  |
| ALAS1   | 0.77   | 0.68   | 0.53   | 0.66 | 0.10  | 1.67       | 1.86       | 2.17       | 1.90     | 0.21  | 1.82  | 2.53  | 1.67  | 2.01 | 0.38  |
| ALDH2   | 0.86   | 0.75   | 1.26   | 0.96 | 0.22  | 0.87       | 1.13       | 1.57       | 1.19     | 0.29  | 0.95  | 1.12  | 1.37  | 1.15 | 0.17  |
| ARNT    | 0.89   | 1.21   | 0.86   | 0.99 | 0.16  | 0.91       | 1.12       | 1.02       | 1.02     | 0.08  | 0.93  | 1.18  | 1.24  | 1.12 | 0.14  |
| CCL2    | 0.64   | 0.72   | 0.84   | 0.73 | 0.08  | 1.15       | 1.34       | 0.95       | 1.15     | 0.16  | 0.72  | 0.97  | 1.12  | 0.94 | 0.16  |
| CEBP    | 1.27   | 0.94   | 1.12   | 1.11 | 0.13  | 1.14       | 1.21       | 1.07       | 1.14     | 0.06  | 1.03  | 1.27  | 1.11  | 1.14 | 0.10  |
| CPT1A   | 0.62   | 0.73   | 0.53   | 0.63 | 0.08  | 3.28       | 4.24       | 2.78       | 3.43     | 0.61  | 2.49  | 1.86  | 1.67  | 2.01 | 0.35  |
| CREBBP  | 1.29   | 1.11   | 0.86   | 1.09 | 0.17  | 1.05       | 0.98       | 1.12       | 1.05     | 0.06  | 1.01  | 0.94  | 1.27  | 1.07 | 0.14  |
| CRP     | 0.66   | 0.82   | 0.54   | 0.67 | 0.11  | 1.86       | 1.54       | 1.77       | 1.72     | 0.13  | 1.89  | 1.92  | 1.77  | 1.86 | 0.06  |
| CYP1A1  | 0.31   | 0.61   | 0.43   | 0.45 | 0.12  | 1.84       | 1.54       | 1.89       | 1.76     | 0.15  | 1.37  | 1.54  | 1.67  | 1.53 | 0.12  |
| CYP1A2  | 0.78   | 0.56   | 0.42   | 0.59 | 0.15  | 1.34       | 1.67       | 1.89       | 1.63     | 0.23  | 1.89  | 1.57  | 1.87  | 1.78 | 0.15  |
| CYP2A6  | 1.04   | 0.86   | 0.91   | 0.94 | 0.08  | 1.70       | 1.34       | 1.24       | 1.43     | 0.20  | 1.67  | 1.31  | 1.11  | 1.36 | 0.23  |
| CYP2B6  | 0.76   | 0.54   | 0.59   | 0.63 | 0.09  | 1.70       | 2.15       | 2.67       | 2.17     | 0.39  | 1.74  | 1.57  | 1.67  | 1.66 | 0.07  |
| CYP2C19 | 1.07   | 0.96   | 1.21   | 1.08 | 0.10  | 1.21       | 1.24       | 1.02       | 1.16     | 0.10  | 1.13  | 0.95  | 1.15  | 1.08 | 0.09  |
| CYP2C8  | 0.59   | 0.37   | 0.48   | 0.48 | 0.09  | 2.19       | 3.45       | 2.87       | 2.84     | 0.52  | 3.67  | 3.89  | 3.45  | 3.67 | 0.18  |
| CYP2C9  | 0.92   | 1.09   | 1.12   | 1.04 | 0.09  | 1.11       | 0.94       | 0.68       | 0.91     | 0.18  | 1.21  | 1.08  | 1.31  | 1.20 | 0.09  |
| CYP2D6  | 0.92   | 1.25   | 0.73   | 0.97 | 0.21  | 1.96       | 1.51       | 0.68       | 1.38     | 0.53  | 1.49  | 1.57  | 0.86  | 1.31 | 0.32  |
| CYP2E1  | 0.82   | 1.25   | 1.34   | 1.14 | 0.22  | 1.07       | 1.32       | 1.08       | 1.16     | 0.12  | 0.97  | 0.67  | 1.44  | 1.03 | 0.32  |
| CYP3A4  | 0.56   | 0.72   | 0.63   | 0.64 | 0.07  | 1.80       | 2.42       | 2.65       | 2.29     | 0.36  | 4.12  | 1.89  | 1.27  | 2.43 | 1.22  |
| CYP3A5  | 0.54   | 0.37   | 0.68   | 0.53 | 0.13  | 1.24       | 1.78       | 1.36       | 1.46     | 0.23  | 1.56  | 1.67  | 1.74  | 1.66 | 0.07  |
| CYP3A7  | 0.68   | 0.87   | 0.51   | 0.69 | 0.15  | 1.30       | 1.66       | 1.83       | 1.60     | 0.22  | 1.64  | 1.81  | 1.76  | 1.74 | 0.07  |
| CYP7A1  | 0.19   | 0.24   | 0.57   | 0.33 | 0.17  | 0.47       | 0.51       | 0.37       | 0.45     | 0.06  | 0.37  | 0.36  | 0.48  | 0.40 | 0.05  |
| DPVD    | 0.67   | 0.91   | 1.24   | 0.94 | 0.23  | 0.85       | 1.21       | 1.12       | 1.06     | 0.15  | 0.83  | 1.18  | 1.34  | 1.12 | 0.21  |
| ELK1    | 1.01   | 1.24   | 1.25   | 1.17 | 0.11  | 0.95       | 0.89       | 1.02       | 0.95     | 0.05  | 0.95  | 1.08  | 1.17  | 1.07 | 0.09  |
| FABP1   | 0.64   | 0.43   | 0.55   | 0.54 | 0.08  | 2.70       | 3.12       | 2.74       | 2.85     | 0.19  | 1.88  | 2.18  | 2.18  | 2.08 | 0.14  |
| FDFIT1  | 0.92   | 1.19   | 1.21   | 1.11 | 0.13  | 1.17       | 1.12       | 1.02       | 1.10     | 0.06  | 1.17  | 1.18  | 1.27  | 1.21 | 0.04  |
| FOS     | 1.13   | 1.63   | 0.34   | 1.03 | 0.53  | 1.77       | 1.48       | 1.36       | 1.54     | 0.17  | 1.41  | 1.37  | 1.58  | 1.45 | 0.09  |
| FOXO1   | 1.21   | 0.84   | 0.67   | 0.91 | 0.22  | 1.00       | 0.85       | 0.67       | 0.84     | 0.14  | 0.97  | 1.08  | 0.94  | 1.00 | 0.06  |
| GGPC    | 0.95   | 1.12   | 0.87   | 0.98 | 0.10  | 1.12       | 0.97       | 1.11       | 1.07     | 0.07  | 1.09  | 1.17  | 1.18  | 1.15 | 0.04  |
| GSTA2   | 0.62   | 1.12   | 1.32   | 1.02 | 0.30  | 0.83       | 0.92       | 1.54       | 1.10     | 0.32  | 0.90  | 1.12  | 1.27  | 1.10 | 0.15  |
| GSTM1   | 0.87   | 1.15   | 0.67   | 0.90 | 0.20  | 0.83       | 0.56       | 1.24       | 0.88     | 0.28  | 0.95  | 0.92  | 0.94  | 0.94 | 0.01  |
| GSTP1   | 1.01   | 1.24   | 0.86   | 1.04 | 0.16  | 0.93       | 1.08       | 1.33       | 1.11     | 0.16  | 0.86  | 1.05  | 1.21  | 1.04 | 0.14  |
| HK2     | 1.10   | 0.75   | 0.36   | 0.74 | 0.30  | 1.09       | 1.12       | 1          | 1.07     | 0.05  | 1.04  | 0.86  | 1.15  | 1.02 | 0.12  |
| HMGCR   | 0.98   | 1.05   | 0.84   | 0.96 | 0.09  | 0.92       | 1.67       | 1.88       | 1.49     | 0.41  | 1.00  | 1.27  | 1.57  | 1.28 | 0.23  |
| HMGCS2  | 0.68   | 0.42   | 0.37   | 0.49 | 0.13  | 4.06       | 3.12       | 4.65       | 3.94     | 0.63  | 3.34  | 2.67  | 3.12  | 3.04 | 0.28  |
| HMOX1   | 1.29   | 1.19   | 1.24   | 1.24 | 0.04  | 1.74       | 1.57       | 1.21       | 1.51     | 0.22  | 1.63  | 1.27  | 1.54  | 1.48 | 0.15  |
| HNF1A   | 0.77   | 0.57   | 0.61   | 0.65 | 0.09  | 0.97       | 1.34       | 1.27       | 1.19     | 0.16  | 1.01  | 1.21  | 1.08  | 1.10 | 0.08  |
| HNF4A   | 0.72   | 0.76   | 0.84   | 0.77 | 0.05  | 0.91       | 1.34       | 1.12       | 1.12     | 0.18  | 0.89  | 0.96  | 1.08  | 0.98 | 0.08  |
| IL1b    | 1.39   | 1.58   | 2.4    | 1.79 | 0.44  | 0.45       | 0.64       | 0.75       | 0.61     | 0.12  | 0.66  | 0.53  | 0.42  | 0.54 | 0.10  |
| IL6     | 1.57   | 1.86   | 1.57   | 1.67 | 0.14  | 0.86       | 0.48       | 0.77       | 0.70     | 0.16  | 0.87  | 0.94  | 0.76  | 0.86 | 0.07  |
| IL8     | 1.47   | 1.53   | 1.56   | 1.52 | 0.04  | 1.08       | 0.82       | 0.71       | 0.87     | 0.16  | 1.10  | 0.48  | 0.86  | 0.81 | 0.25  |
| INSIG1  | 0.63   | 0.51   | 0.37   | 0.50 | 0.11  | 0.97       | 1.12       | 1.08       | 1.06     | 0.06  | 1.21  | 1.12  | 1.08  | 1.14 | 0.05  |
| INSIG2  | 1.44   | 1.12   | 1.02   | 1.19 | 0.18  | 0.90       | 1.05       | 1.16       | 1.04     | 0.10  | 0.86  | 1.28  | 0.57  | 0.90 | 0.29  |
| JUN     | 1.96   | 1.24   | 1.12   | 1.44 | 0.37  | 1.05       | 0.94       | 0.86       | 0.95     | 0.08  | 1.02  | 1.18  | 0.97  | 1.06 | 0.09  |
| NAT1    | 0.75   | 0.86   | 1.04   | 0.88 | 0.12  | 1.10       | 1.34       | 1.25       | 1.23     | 0.10  | 0.99  | 1.02  | 1.34  | 1.12 | 0.16  |
| NAT2    | 0.80   | 0.94   | 1.21   | 0.98 | 0.17  | 0.99       | 1.27       | 1.26       | 1.17     | 0.13  | 0.96  | 1.27  | 1.64  | 1.29 | 0.28  |
| NCOA1   | 1.14   | 1.12   | 1.08   | 1.11 | 0.02  | 1.12       | 1.35       | 1.23       | 1.23     | 0.09  | 1.09  | 0.97  | 0.84  | 0.97 | 0.10  |
| NCOA2   | 0.93   | 1.24   | 1.08   | 1.08 | 0.13  | 0.98       | 0.86       | 0.67       | 0.84     | 0.13  | 1.02  | 0.67  | 1.12  | 0.94 | 0.19  |
| NCOA3   | 1.30   | 1.34   | 1.21   | 1.28 | 0.05  | 1.08       | 1.21       | 1.02       | 1.10     | 0.08  | 1.02  | 0.67  | 0.98  | 0.89 | 0.16  |
| NFKBIA  | 1.16   | 1.02   | 1.32   | 1.17 | 0.22  | 1.41       | 1.24       | 1.26       | 1.30     | 0.07  | 1.23  | 1.32  | 1.12  | 1.22 | 0.08  |
| NOS2    | 1.95   | 1.24   | 1.65   | 1.61 | 0.29  | 4.88       | 3.24       | 2.67       | 3.60     | 0.94  | 2.67  | 2.15  | 2.77  | 2.53 | 0.27  |
| NR0B2   | 1.78   | 1.54   | 1.86   | 1.73 | 0.14  | 1.05       | 1.53       | 1.45       | 1.34     | 0.21  | 0.95  | 1.12  | 1.34  | 1.14 | 0.16  |
| NR1H3   | 0.76   | 0.86   | 0.98   | 0.87 | 0.09  | 1.14       | 1.23       | 1.27       | 1.21     | 0.05  | 1.10  | 1.17  | 1.11  | 1.13 | 0.03  |
| NR1H4   | 0.84   | 0.95   | 1.14   | 0.98 | 0.12  | 0.87       | 1.18       | 1.64       | 1.23     | 0.32  | 0.90  | 0.92  | 0.87  | 0.90 | 0.02  |
| NR1I2   | 0.89   | 0.64   | 0.71   | 0.75 | 0.10  | 1.48       | 1.34       | 1.58       | 1.47     | 0.10  | 0.99  | 1.34  | 1.54  | 1.29 | 0.23  |
| NR1I3   | 0.79   | 0.76   | 0.54   | 0.70 | 0.11  | 1.71       | 1.67       | 2.34       | 1.91     | 0.31  | 1.18  | 1.76  | 1.87  | 1.60 | 0.30  |
| NR2F1   | 0.82   | 0.94   | 1.31   | 1.02 | 0.21  | 0.83       | 0.89       | 0.91       | 0.88     | 0.03  | 0.88  | 1.34  | 1.28  | 1.17 | 0.20  |
| NR2F2   | 0.97   | 1.24   | 0.58   | 0.93 | 0.27  | 0.88       | 0.94       | 0.93       | 0.92     | 0.03  | 1.03  | 1.12  | 1.38  | 1.18 | 0.15  |
| NR3C1   | 1.22   | 1.56   | 1.57   | 1.45 | 0.16  | 0.90       | 0.76       | 0.58       | 0.75     | 0.13  | 0.87  | 0.95  | 0.99  | 0.94 | 0.05  |
| PCK1    | 1.44   | 1.57   | 0.92   | 1.31 | 0.28  | 1.29       | 1.05       | 1.23       | 1.19     | 0.10  | 1.13  | 1.34  | 1.18  | 1.22 | 0.09  |
| PDK4    | 0.38   | 0.55   | 0.48   | 0.47 | 0.07  | 4.35       | 5.34       | 5.67       | 5.12     | 0.56  | 3.79  | 3.75  | 3.64  | 3.73 | 0.06  |
| POLR2A  | 0.97   | 1.12   | 1.33   | 1.14 | 0.15  | 0.98       | 1.16       | 1.31       | 1.15     | 0.14  | 0.95  | 0.96  | 0.97  | 0.96 | 0.01  |
| PON1    | 0.68   | 0.57   | 0.64   | 0.63 | 0.04  | 1.47       | 1.34       | 1.54       | 1.45     | 0.08  | 1.44  | 1.54  | 1.67  | 1.55 | 0.09  |
| POR     | 1.27   | 0.7    | 0.64   | 0.87 | 0.28  | 1.58       | 1.62       | 1.43       | 1.54     | 0.08  | 1.58  | 1.57  | 1.34  | 1.50 | 0.11  |
| PPARA   | 0.56   | 0.48   | 0.67   | 0.57 | 0.08  | 1.68       | 1.52       | 1.87       | 1.69     | 0.14  | 1.05  | 1.36  | 1.28  | 1.23 | 0.13  |
| PPARG   | 1.75   | 1.31   | 0.85   | 1.30 | 0.37  | 1.05       | 1.24       | 1.32       | 1.20     | 0.11  | 1.02  | 1.37  | 1.38  | 1.26 | 0.17  |
| PTGS2   | 4.61   | 1.53   | 1.75   | 2.63 | 1.40  | 1.01       | 0.68       | 0.74       | 0.81     | 0.14  | 0.64  | 0.84  | 0.97  | 0.82 | 0.14  |
| RXRA    | 0.79   | 0.83   | 0.71   | 0.78 | 0.05  | 0.87       | 0.89       | 0.91       | 0.89     | 0.02  | 0.96  | 0.67  | 1.24  | 0.96 | 0.23  |
| SCD     | 0.79   | 0.86   | 0.92   | 0.86 | 0.05  | 1.52       | 1.34       | 1.67       | 1.51     | 0.13  | 1.57  | 1.67  | 1.84  | 1.69 | 0.11  |
| SLC10A1 | 0.84   | 1.32   | 0.87   | 1.01 | 0.22  | 0.81       | 0.84       | 0.97       | 0.87     | 0.07  | 0.81  | 1.34  | 1.58  | 1.24 | 0.32  |
| SLC22A7 | 0.62   | 0.75   | 1.11   | 0.83 | 0.21  | 1.39       | 1.37       | 1.42       | 1.39     | 0.02  | 1.09  | 0.94  | 0.88  | 0.97 | 0.09  |
| SLCO1B1 | 0.70   | 0.67   | 1.11   | 0.83 | 0.20  | 0.96       | 1.02       | 1.34       | 1.11     | 0.17  | 1.04  | 0.67  | 0.81  | 0.84 | 0.15  |
| SOC3    | 0.90   | 0.83   | 0.67   | 0.80 | 0.10  | 1.34       | 1.12       | 1.68       | 1.38     | 0.23  | 1.57  | 1.34  | 1.08  | 1.33 | 0.20  |
| SOD2    | 1.69   | 1.54   | 1.64   | 1.62 | 0.06  | 0.83       | 0.92       | 1.11       | 0.95     | 0.12  | 0.87  | 1.12  | 1.34  | 1.11 | 0.19  |
| SREBF1  | 0.86   | 1.41   | 1.13   | 1.13 | 0.22  | 1.27       | 1.34       | 1.58       | 1.40     | 0.13  | 1.24  | 1.71  | 1.02  | 1.32 | 0.29  |
| SREBF2  | 1.01   | 1.08   | 0.98   | 1.02 | 0.04  | 0.96       | 0.94       | 0.76       |          |       |       |       |       |      |       |
